# Supplementary material for: Insights into Nutritional Strategies in Psoriasis
Source: MDPI journal article supplement (doi:10.3390/nu15163528), 2023-08-10
Supplement: s1 [file s1]

# Insights in Nutritional Strategies in Psoriasis

Carolina Constantin <sup>1,2</sup>, Mihaela Surcel <sup>1</sup>, Adriana Munteanu <sup>1</sup> and Monica Neagu <sup>1,2,3,\*</sup>

**Table S1.** Recent genetically engineered mouse models of Ps.

| Animal Model                      | Gene                | Strain   |
|-----------------------------------|---------------------|----------|
| IL-19 <sup>-/-</sup>              | <i>Il19</i>         | C57BL/6  |
| IL20RB <sup>-/-</sup>             | <i>Il20rb</i>       | C57BL/6  |
| CD11c-Ecaddel                     | <i>Cdh1</i>         | C57BL/6  |
| LATΔCD4                           | <i>Slc7a5</i>       | C57BL/6  |
| LATΔRΔT                           | <i>Slc7a5</i>       | C57BL/6  |
| LATΔK5                            | <i>Slc7a5</i>       | C57BL/6  |
| PARP1 <sup>-/-</sup>              | <i>Parp1</i>        | C57BL/6  |
| BKS.Cg- + Leprdb/+ Leprdb (db/db) | <i>Lepr</i>         | BKS      |
| AhRcVECs-KO                       | <i>Ahr</i>          | C57BL/6  |
| icIL-1Ra1 <sup>-/-</sup>          | <i>Ic1l1rn1</i>     | C57BL/6  |
| IL-1RaΔM                          | <i>Il1rn</i>        | C57BL/6  |
| Nrf2 <sup>-/-</sup>               | <i>Nfe2l2</i>       | C57BL/6  |
| Raptor-f/f; CD2-cre (Raptor KO)   | <i>Raptor</i>       | C57BL/6  |
| Rictor-f/f; CD2-cre (Rictor KO)   | <i>Rictor</i>       | C57BL/6  |
| S1pr4 <sup>-/-</sup>              | <i>S1pr4</i>        | C57BL/6  |
| Krt14Cre/+ hmgb1f/f               | <i>Hmgb1</i>        | C57BL/6  |
| Il36rΔK                           | <i>Il1rl2</i>       | C57BL/6  |
| Il36r <sup>-/-</sup>              | <i>Il1rl2</i>       | C57BL/6  |
| Trpc4 <sup>-/-</sup>              | <i>Trpc4</i>        | C57BL/6  |
| KOB1 <sup>-/-</sup>               | <i>Bdkrb1</i>       | C57BL/6  |
| KOB2 <sup>-/-</sup>               | <i>Bdkrb2</i>       | C57BL/6  |
| KOB1B2 <sup>-/-</sup>             | <i>Bdkrb1Bdkrb2</i> | C57BL/6  |
| IRF5 <sup>-/-</sup>               | <i>Irf5</i>         | C57BL/6  |
| miR-205-5p agomiR                 | <i>miR-205-5p</i>   | BALB/c   |
| C3 <sup>-/-</sup>                 | <i>C3</i>           | C57BL/6  |
| IL36rn <sup>-/-</sup>             | <i>Il36rn</i>       | C57BL/6  |
| Ovol <sup>-/-</sup>               | <i>Ovol1</i>        | C57BL/6  |
| humanized DITRA mice              | <i>IL36RN</i>       |          |
| Trim21 siRNA                      | <i>Trim21</i>       | BALB/c   |
| Tg2 <sup>-/-</sup>                | <i>Tg2</i>          | BC57BL/6 |
| Sirt2 <sup>-/-</sup>              | <i>Sirt2</i>        | C57BL/6N |
| IL-33 <sup>-/-</sup>              | <i>Il33</i>         | C57BL/6  |
| St2 <sup>-/-</sup>                | <i>St2</i>          | C57BL/6  |
| IL-33f/fK5Cre                     | <i>Il33</i>         | C57BL/6  |
| K17 siRNA                         | <i>K17</i>          | BALB/c   |
| Csf-1RiCreALK3fl/fl               | <i>CSF1R-ALK3</i>   | C57BL/6  |
| S100a8 <sup>-/-</sup>             | <i>S100a8</i>       | C57BL/6  |

| S100a9 <sup>-/-</sup><br>R26Cyp1a1<br>Ahr <sup>-/-</sup> | S100a9<br>Cyp1a1<br>Ahr | C57BL/6<br>C57BL/6<br>C57BL/6 |
|----------------------------------------------------------|-------------------------|-------------------------------|
| K14creMalt1fl/fl                                         | <i>Malt1</i>            | C57BL/6                       |
| Zdhhc2 <sup>-/-</sup>                                    | <i>Zdhhc2</i>           | C57BL/6                       |
| C6st1 <sup>-/-</sup>                                     | <i>Chst3</i>            | C57BL/6                       |
| CD19cre-Itga4flox/flox                                   | <i>Itga4</i>            | C57BL/6                       |
| hCD20TAMCreItga4flox/flox                                | <i>Itga4</i>            | C57BL/6                       |
| hCD20TAMCreIl10flox/flox                                 | <i>Il10</i>             | C57BL/6                       |
| Mapk8 <sup>-/-</sup>                                     | <i>Mapk8</i>            | C57BL/6                       |
| LysMCre Mapk8fl/fl, Mapk8 $\delta$ M                     | <i>LYSMD4-MAPK8</i>     | C57BL/6                       |
| ItgaxCre Mapk8fl/fl, Mapk8 $\delta$ DC                   | <i>ITGAX-MAPK8</i>      | C57BL/6                       |
| K14cre Mapk8fl/fl, Mapk8 $\delta$ Ep                     | <i>KRT14-MAPK8</i>      | C57BL/6                       |
| PLA2G4B siRNA                                            | <i>Pla2g4b</i>          | C57BL/6                       |
| LRG <sup>-/-</sup>                                       | <i>Lrg1</i>             | C57BL/6                       |
| CCR4 <sup>-/-</sup>                                      | <i>Ccr4</i>             | C57BL/6                       |
| c-Jun $\Delta$ /Mx1-Cre                                  | <i>cjun</i>             | C57BL/6                       |
| c-Jun $\Delta$ /Cd11c-Cre                                | <i>cjun</i>             | C57BL/6                       |
| c-Jun $\Delta$ /K5ERT2-Cre                               | <i>cjun</i>             | C57BL/6                       |
| Tlr7 <sup>-/-</sup>                                      | <i>Tlr7</i>             | C57BL/6                       |
| Ccl2 <sup>-/-</sup>                                      | <i>Ccl2</i>             | C57BL/6                       |
| Nedd4l <sup>-/-</sup>                                    | <i>Nedd4l</i>           | BALB/c                        |
| Nedd4l/f Krt14Cre                                        | <i>Nedd4l</i>           | BC57BL/6                      |
| ApoE/SKH-hr2                                             | <i>ApoE/Skh-hr2</i>     | C57BL/6 and<br>BALB/c         |
| sh-EZH2                                                  | <i>Ezh2</i>             | BALB/c                        |
| N4BP1 <sup>-/-</sup>                                     | <i>N4bp1</i>            | C57BL/6                       |
| $\Delta$ Ctermut/mut                                     | <i>Il22ra1</i>          | B6D2x C57BL/6                 |
| Il22ra1 <sup>-/-</sup>                                   | <i>Il22ra1</i>          | C57BL/6                       |
| OFA RAT                                                  | <i>Dsg-4</i>            | Sprague-Dawley<br>RAT         |
| miR-149                                                  | <i>miR-149</i>          | C57BL/6                       |
| SRSF10                                                   | <i>mSRSF10</i>          | BALB/c                        |
| E130307A14-Rik                                           | <i>E130307A14-Rik</i>   | BALB/c                        |
| Rag2 <sup>-/-</sup> + shCDK7 CD4 <sup>+</sup> T cells    | <i>Rag2, Cdk7</i>       | C57BL/6                       |

**Table S2.** Ps animal model that over-express keratinocyte cell specific promoters.

| <b>Molecule Type</b>                          | <b>Name</b>                                                            |
|-----------------------------------------------|------------------------------------------------------------------------|
| Cytokines                                     | IL6, TNFA, IL1a, IFN $\gamma$ , IL12b, IL36a, IL36a/IL36rn, IL20, IL23 |
| Adhesion molecules                            | ITGB1, ITGA2-IGAB1, ITGA5-ITGAB1                                       |
| Growth factors                                | KGF, TGFB1, Tgfb1, BMP6, AREG, Vegfa, Tgfa, Angptl6                    |
| Signaling molecules and transcription factors | MAP2K1, Stat3c, Rac1v12, Mek1                                          |
| Hormones                                      | Leptin                                                                 |
